# Supplementary material for: Differentially Expressed Genes in Response to a Squalene-Supplemented Diet Are Accurate Discriminants of Porcine Non-Alcoholic Steatohepatitis
Source: MDPI journal article supplement (doi:10.3390/ijms241612552), 2023-08-08
Supplement: s1 [file s1]

**Supplementary Table S1.** Genes comprised in the main categories displayed in Figure 2B of gene ontology classification of biological processes of up-regulated and down-regulated genes.

| GO term                          | Regulation | Number of annotated genes | Gene symbols                                                                                                                                                                                                                                                                              |
|----------------------------------|------------|---------------------------|-------------------------------------------------------------------------------------------------------------------------------------------------------------------------------------------------------------------------------------------------------------------------------------------|
| Cellular process                 | Up         | 36                        | <i>AFP, ANO3, BORCS6, CBLC, CCL20, CDK1, CDK3, CLDN6, CXCL10, CXCL8, ENPEP, FOXG1, HTRA3, IFIT2, IFIT3, INHBB, ISG15, KCTD14, LIF, LOC100157935, LOC100516302, LOC110255217, MLC1, PKP3, PLP1, PLPPR2, PPP1R1B, RGS5, RSAD2, SDCBP2, SEMA3A, SERPINB2, SLITRK5, SPRY3, SYCE1L, TMIGD3</i> |
|                                  | Down       | 10                        | <i>APOD, CA3, CRABP1, DEFB1, KCNJ3, LOC100621701, NPSR1, PIWIL2, RASL10A, SYT17</i>                                                                                                                                                                                                       |
| Biological regulation            | Up         | 28                        | <i>AFP, ANO3, CBLC, CCL20, CDK1, CDK3, CXCL10, CXCL8, ENPEP, FOXG1, HTRA3, IFIT3, INHBB, ISG15, LIF, LOC100516302, LOC110255217, MLC1, PKP3, PLP1, PLPPR2, RGS5, RSAD2, SEMA3A, SERPINB2, SLITRK5, SPRY3, TMIGD3</i>                                                                      |
|                                  | Down       | 7                         | <i>APOD, CRABP1, DEFB1, NPSR1, PIWIL2, RASL10A, SYT17</i>                                                                                                                                                                                                                                 |
| Regulation of biological process | Up         | 26                        | <i>AFP, CBLC, CCL20, CDK1, CDK3, CXCL10, CXCL8, FOXG1, HTRA3, IFIT3, INHBB, ISG15, LIF, LOC100516302, LOC110255217, MLC1, PKP3, PLP1, PLPPR2, RGS5, RSAD2, SEMA3A, SERPINB2, SLITRK5, SPRY3, TMIGD3</i>                                                                                   |
|                                  | Down       | 7                         | <i>APOD, CRABP1, DEFB1, NPSR1, PIWIL2, RASL10A, SYT17</i>                                                                                                                                                                                                                                 |
| Response to stimulus             | Up         | 25                        | <i>AFP, CBLC, CCL20, CDK1, CDK3, CXCL10, CXCL8, FOXG1, IFIT2, IFIT3, INHBB, ISG15, LIF, LOC100153139, LOC106504372, LOC110255217, MLC1, OASL, PLP1, PLPPR2, RGS5, RSAD2, SEMA3A, SLITRK5, SPRY3</i>                                                                                       |
|                                  | Down       | 5                         | <i>APOD, CRABP1, DEFB1, LOC100525396, RASL10A</i>                                                                                                                                                                                                                                         |
| Metabolic process                | Up         | 20                        | <i>AFP, CBLC, CCL20, CDK1, CDK3, CXCL8, ENPEP, FOXG1, INHBB, ISG15, LIF, LOC100157935, LOC100516302, LOC100526118, MMP1, PKP3, PLP1, PLPPR2, RSAD2, TMIGD3</i>                                                                                                                            |
|                                  | Down       | 5                         | <i>APOD, CA3, CRABP1, PIWIL2, SQLE</i>                                                                                                                                                                                                                                                    |
| Localization                     | Up         | 18                        | <i>AFP, ANO3, BORCS6, CCL20, CDK1, CXCL10, CXCL8, ENPEP, FOXG1, INHBB, LIF, LOC100157935, MLC1, PKP3, RSAD2, SEMA3A, SYCE1L, TMIGD3</i>                                                                                                                                                   |
|                                  | Down       | 5                         | <i>APOD, DEFB1, KCNJ3, NPSR1, SYT17</i>                                                                                                                                                                                                                                                   |
| Multicellular organismal process | Up         | 16                        | <i>AFP, CDK1, CDK3, CXCL10, CXCL8, ENPEP, FOXG1, GUCA1A, INHBB, ISG15,</i>                                                                                                                                                                                                                |

|                                           |      |    |                                                                                                                                    |
|-------------------------------------------|------|----|------------------------------------------------------------------------------------------------------------------------------------|
|                                           |      |    | <i>LIF, PLP1, RSAD2, SEMA3A, SLITRK5, SPRY3</i>                                                                                    |
|                                           | Down | 6  | <i>APOD, CRABP1, DEFB1, LOC100621701, PIWIL2, SYT17</i>                                                                            |
| Signaling                                 | Up   | 17 | <i>AFP, CBLC, CCL20, CDK3, CXCL10, CXCL8, INHBB, LIF, LOC110255217, PLP1, PLPPR2, PPP1R1B, RGS5, RSAD2, SEMA3A, SLITRK5, SPRY3</i> |
|                                           | Down | 5  | <i>APOD, CRABP1, DEFB1, LOC100621701, RASL10A</i>                                                                                  |
| Developmental process                     | Up   | 14 | <i>AFP, CDK1, CDK3, CXCL10, CXCL8, FOXG1, INHBB, ISG15, LIF, PLP1, RSAD2, SEMA3A, SLITRK5, SPRY3</i>                               |
|                                           | Down | 6  | <i>APOD, CRABP1, DEFB1, LOC100621701, PIWIL2, SYT17</i>                                                                            |
| Positive regulation of biological process | Up   | 16 | <i>CCL20, CDK1, CDK3, CXCL10, CXCL8, FOXG1, INHBB, ISG15, LIF, LOC110255217, MLC1, PKP3, PLP1, RSAD2, SEMA3A, SLITRK5</i>          |
|                                           | Down | 4  | <i>DEFB1, NPSR1, PIWIL2, SYT17</i>                                                                                                 |
| Negative regulation of biological process | Up   | 16 | <i>CBLC, CDK1, CXCL10, CXCL8, FOXG1, IFIT3, INHBB, ISG15, LIF, LOC100516302, PKP3, RGS5, RSAD2, SEMA3A, SERPINB2, TMIGD3</i>       |
|                                           | Down | 3  | <i>APOD, NPSR1, PIWIL2,</i>                                                                                                        |
| Immune system process                     | Up   | 11 | <i>CCL20, CXCL10, CXCL8, IFIT3, ISG15, LIF, LOC100153139, LOC106504372, LOC110255217, OASL, RSAD2</i>                              |
|                                           | Down | 3  | <i>APOD, DEFB1, LOC100525396</i>                                                                                                   |
| Interspecies interaction among organisms  | Up   | 9  | <i>CCL20, CXCL10, CXCL8, IFIT3, ISG15, LOC110255217, OASL, RSAD2, SYCE1L</i>                                                       |
|                                           | Down | 1  | <i>DEFB1</i>                                                                                                                       |
| Locomotion                                | Up   | 7  | <i>CCL20, CXCL8, CXCL10, ENPEP, FOXG1, SEMA3A, TMIGD3</i>                                                                          |
|                                           | Down | 2  | <i>APOD, DEFB1</i>                                                                                                                 |
| Reproduction                              | Up   | 5  | <i>AFP, CDK1, INHBB, LIF, SEMA3A</i>                                                                                               |
|                                           | Down | 2  | <i>DEFB1, PIWIL2</i>                                                                                                               |
| Reproductive process                      | Up   | 5  | <i>AFP, CDK1, INHBB, LIF, SEMA3A</i>                                                                                               |
|                                           | Down | 2  | <i>DEFB1, PIWIL2</i>                                                                                                               |
| Multi-organism process                    | Up   | 4  | <i>AFP, CDK1, INHBB, LIF</i>                                                                                                       |
|                                           | Down | 2  | <i>DEFB1, PIWIL2</i>                                                                                                               |
| Growth                                    | Up   | 2  | <i>HTRA3, SEMA3A</i>                                                                                                               |
|                                           | Down | 2  | <i>APOD, SYT17</i>                                                                                                                 |
| Biological adhesion                       | Up   | 1  | <i>CXCL8</i>                                                                                                                       |
|                                           | Down | 2  | <i>APOD, LOC100621701</i>                                                                                                          |
| Behavior                                  | Up   | 1  | <i>SLITRK5</i>                                                                                                                     |
|                                           | Down | -  | -                                                                                                                                  |
| Biom mineralization                       | Up   | 1  | <i>ISG15</i>                                                                                                                       |
|                                           | Down | -  | -                                                                                                                                  |
| Rhythmic process                          | Up   | 1  | <i>AFP</i>                                                                                                                         |
|                                           | Down | -  | -                                                                                                                                  |

**Supplementary Table S2.** Genes comprised in the main categories displayed in Figure 2C of gene ontology classification of cellular processes of genes.

| GO term                    | Regulation | Number of annotated genes | Gene symbols                                                                                                                                                                                                                                                                                                                              |
|----------------------------|------------|---------------------------|-------------------------------------------------------------------------------------------------------------------------------------------------------------------------------------------------------------------------------------------------------------------------------------------------------------------------------------------|
| Cellular anatomical entity | Up         | 41                        | <i>AFP, ANO3, BORCS6, CBLC, CCL20, CDK1, CDK3, CLDN6, CXCL10, CXCL8, ENPEP, FOXG1, GUCA1A, HTRA3, IFIT3, INHBB, ISG15, LIF, LOC100153139, LOC100157935, LOC100516302, LOC106504372, LOC110255217, MLC1, MMP1, NRM, PI15, PKP3, PLP1, PLPPR2, RGS5, RSAD2, SDCBP2, SEMA3A, SERPINB2, SERPINB7, SLITRK5, SPRY3, SYCE1L, TMEM45B, TMIGD3</i> |
|                            | Down       | 15                        | <i>APOD, CA3, CPNE4, CRABP1, DEFB1, KCNJ3, LOC100525396, LOC100621701, NPSR1, PIWIL2, RASL10A, SHISA3, SQLE, SYT17, TECTB</i>                                                                                                                                                                                                             |
| Intracellular              | Up         | 21                        | <i>AFP, BORCS6, CBLC, CCL20, CDK1, CDK3, CXCL8, ENPEP, FOXG1, IFIT3, INHBB, LIF, LOC100157935, LOC110255217, MLC1, NRM, PKP3, RGS5, RSAD2, SDCBP2, SYCE1L</i>                                                                                                                                                                             |
|                            | Down       | 7                         | <i>APOD, CA3, CRABP1, DEFB1, PIWIL2, SQLE, SYT17</i>                                                                                                                                                                                                                                                                                      |
| Protein-containing complex | Up         | 8                         | <i>BORCS6, CDK1, CDK3, LOC100153139, LOC100157935, LOC106504372, PKP3, SLITRK5</i>                                                                                                                                                                                                                                                        |
|                            | Down       | 3                         | <i>APOD, KCNJ3, PIWIL2</i>                                                                                                                                                                                                                                                                                                                |

**Supplementary Table S3.** Genes comprised in the main categories displayed in Figure 2D according to Kyoto Encyclopedia of Genes and Genomes (KEGG).

| Pathways            | Number of annotated genes | Differentially expressed genes                                                             |
|---------------------|---------------------------|--------------------------------------------------------------------------------------------|
| Viral myocarditis   | 5                         | <i>LOC110256649, LOC106504372, LOC100153139, LOC110258821</i> and <i>BGI_novel_G000045</i> |
| Hepatitis C         | 5                         | <i>IFIT1, IFIT3, IFIT2, CXCL8</i> and <i>CLDN6</i>                                         |
| Chemokine signaling | 6                         | <i>CXCL10, BGI_novel_G000048, LOC100525396, CCL20, CXCL8</i> and <i>LOC110255211</i>       |
| Herpes infection    | 8                         | <i>IFIT1, IFIT3, IFIT2, LOC106504372, LOC100153139, CDK1, MAP3K7CL</i> and <i>SHISA3</i>   |
| NOD-like receptor   | 5                         | <i>GVIN1, BGI_novel_G000048, LOC100525396, CXCL8</i> and <i>MAP3K7CL</i>                   |
| Influenza A         | 5                         | <i>CXCL10, RSAD2, LOC106504372, LOC100153139</i> and <i>CXCL8</i>                          |

**Supplementary Table S4. Characteristics of primers used in RT-qPCR according to MIQE guidelines.**

| Gene symbol              | Accession      |           | Sequence              | Amplicon length | Exons | [Primer]     | Efficiency |
|--------------------------|----------------|-----------|-----------------------|-----------------|-------|--------------|------------|
| <b><i>Sus scrofa</i></b> |                |           |                       |                 |       |              |            |
| <i>PPP1R1B</i>           | XM_021067044.1 | Sense     | GGCACCACCTCAAGTCGAAG  | 99              | NA    | 0.08 $\mu$ M | 99%        |
|                          | XM_021067045.1 | Antisense | TGATGGACTGCAGGTGAGAC  |                 |       |              |            |
|                          | XM_021067046.1 |           |                       |                 |       |              |            |
|                          | XM_021067047.1 |           |                       |                 |       |              |            |
| <i>OASL</i>              | NM_001031790.1 | Sense     | GTGTGGTTGGTCGAGGAAGT  | 98              | 2     | 0.08 $\mu$ M | 101%       |
|                          |                | Antisense | CTGTAGGCAGGCATGATGGT  |                 |       |              |            |
| <i>PPP4R4</i>            | XM_021099655.1 | Sense     | ATATGCCTGTCTCCCACACG  | 115             | NA    | 0.2 $\mu$ M  | 97 %       |
|                          | XM_021099656.1 | Antisense | TGAAGCTGCCTTTTGCACAG  |                 |       |              |            |
|                          | XM_021099657.1 |           |                       |                 |       |              |            |
|                          | XM_021099658.1 |           |                       |                 |       |              |            |
|                          | XM_021099659.1 |           |                       |                 |       |              |            |
|                          | XM_021099660.1 |           |                       |                 |       |              |            |
|                          | XM_021099661.1 |           |                       |                 |       |              |            |
|                          | XM_021099662.1 |           |                       |                 |       |              |            |
| <i>HES4</i>              | XM_003481929.4 | Sense     | GAAAGAGAGTTCCCGCCACT  | 181             | NA    | 0.2 $\mu$ M  | 99 %       |
|                          |                | Antisense | GACCAGGAATCGGTTACCT   |                 |       |              |            |
| <i>NEURL3</i>            | XM_003124839.5 | Sense     | CATGGATCCTACAGCCAGCG  | 203             | NA    | 0.2 $\mu$ M  | 102%       |
|                          |                | Antisense | GGCATTGGCCGTGTCTTTG   |                 |       |              |            |
| <i>HTD2</i>              | XM_003132274.4 | Sense     | GTGGGGTTGGACTGAATGCT  | 97              | NA    | 0.2 $\mu$ M  | 98%        |
|                          | XM_021069097.1 | Antisense | ATGTCCAAGGGTAAGGCAGC  |                 |       |              |            |
|                          | XM_021069098.1 |           |                       |                 |       |              |            |
|                          | XM_003132275.4 |           |                       |                 |       |              |            |
| <i>CYP2C32</i>           | XM_013983597.2 | Sense     | GCCCGCATGGAGCTATTTTT  | 115             | NA    | 0.08 $\mu$ M | 96%        |
|                          |                | Antisense | CGTGGCTGAACCCACTATAAA |                 |       |              |            |
| <i>AFP</i>               | NM_214317.1    | Sense     | AGAGGAACAACCTTGAGGCCG | 107             | 13/14 | 0.1 $\mu$ M  | 101%       |
|                          |                | Antisense | TCAGTGCTGGACCCCTCTCT  |                 |       |              |            |
| <i>TMEM45B</i>           | XM_021063152.1 | Sense     | TTGTGCTGGAGCTTTTCCGA  | 109             | NA    | 0.2 $\mu$ M  | 98%        |
|                          | XM_021063153.1 | Antisense | TTCTGGTCCCATTGAGGTGC  |                 |       |              |            |
|                          | XM_021063154.1 |           |                       |                 |       |              |            |
|                          | XM_021063155.1 |           |                       |                 |       |              |            |

|                     |                |           |                       |     |      |         |      |
|---------------------|----------------|-----------|-----------------------|-----|------|---------|------|
| XM_021063156.1      |                |           |                       |     |      |         |      |
| <i>ENPEP</i>        | NM_214017.1    | Sense     | TATCTGTGCAGCGGTAGTGG  | 286 | 1    | 0.1 µM  | 102% |
|                     |                | Antisense | GGAGATGTTCACTGTCCCCG  |     |      |         |      |
| <i>LOC110256649</i> | XM_021072807.1 | Sense     | ACAACACGGCTGAAGGTAGG  | 199 | NA   | 0.2 µM  | 102% |
|                     |                | Antisense | TCTGAGGTGGGATCAAAAGG  |     |      |         |      |
| <i>CYP2J34</i>      | NM_001244633.1 | Sense     | AGCGGTTTGACTACCAGGATG | 91  | 4/5  | 0.2 µM  | 100% |
|                     |                | Antisense | AGCTGGACCTGCACTGATGTG |     |      |         |      |
| <i>LOC100526118</i> | XM_003128792.4 | Sense     | GGTTATCCGGTGGCTTCTGG  | 152 | NA   | 0.1 µM  | 101% |
|                     |                | Antisense | TCTGGACCAACTTCATGCCA  |     |      |         |      |
| <i>SI00A2</i>       | XM_001929556.5 | Sense     | GGTTGCCACCTTCCACAAGTA | 203 | NA   | 0.08 µM | 102% |
|                     |                | Antisense | CCAGGAAAACGGCATACTCC  |     |      |         |      |
| <i>SPRY3</i>        | XM_013986552.2 | Sense     | CAGCATTACGCCCTCACCTT  | 96  | NA   | 0.2 µM  | 100% |
|                     | XM_003135510.5 | Antisense | GCTTCTCCCTTCAGAGCACC  |     |      |         |      |
| <i>FOXG1</i>        | XM_021099188.1 | Sense     | TATGAGAAGCCGCCGTTTCAG | 171 | NA   | 0.2 µM  | 100% |
|                     |                | Antisense | GAGGGACAGATTGTGGCGAA  |     |      |         |      |
| <i>GTSF1</i>        | XM_003126205.6 | Sense     | AGCCCTGCAAGCAACATAGT  | 87  | NA   | 0.2 µM  | 98%  |
|                     | XM_005663861.3 | Antisense | TGGCAGAACATACGGCAGAG  |     |      |         |      |
| <i>SQLE</i>         | NM_001101026.1 | Sense     | GCAGCTATTCTCCAGGCCAA  | 191 | 8/10 | 0.2 µM  | 99%  |
|                     |                | Antisense | AGCGCAACTGGACCACTAAT  |     |      |         |      |
| <i>CHL1</i>         | XM_021069243.1 | Sense     | CTGCAAACAATGACCCTGTGT | 154 | NA   | 0.2 µM  | 102% |
|                     | XM_021069244.1 | Antisense | GGAGGCAGCCCAGAAAGAAT  |     |      |         |      |
|                     | XM_021069246.1 |           |                       |     |      |         |      |
|                     | XM_013981901.2 |           |                       |     |      |         |      |
|                     | XM_021069247.1 |           |                       |     |      |         |      |
|                     | XM_021069248.1 |           |                       |     |      |         |      |
|                     | XM_021069249.1 |           |                       |     |      |         |      |
|                     | XM_021069250.1 |           |                       |     |      |         |      |
| <i>UBA52</i>        | NM_214211.1    | Sense     | CTGCCGCAAGTGTTATGCTC  | 100 | 4/5  | 0.2 µM  | 102% |
|                     |                | Antisense | TTTGACCTTCTTCTTGGGGCG |     |      |         |      |

NA, Not Applicable

| Gene symbol                      | Accession      |           | Sequence             | Amplicon length | Exon | [Primer] | Efficiency |
|----------------------------------|----------------|-----------|----------------------|-----------------|------|----------|------------|
| <b><i>Homo sapiens</i> genes</b> |                |           |                      |                 |      |          |            |
| <i>PP1R1B</i>                    | NM_032192      | Sense     | GGGCACCATCTCAAGTCGAA | 126             | 4/5  | 0.2 µM   | 92%        |
|                                  | NM_181505      | Antisense | TGAGGCCTGGTTCTCATTCA |                 |      |          |            |
| <i>AFP</i>                       | NM_001134.3    | Sense     | CTTTGGGCTGCTCGCTATGA | 176             | 5/6  | 0.2 µM   | 91%        |
|                                  | NM_001354717   | Antisense | ATGGCTTGGAAGTTCGGGT  |                 | 6/7  |          |            |
| <i>TMEM45B</i>                   | NM_001331210.2 | Sense     | CTCTGTTCGGAGGGTGTGTT | 158             | 5/6  | 0.2 µM   | 95%        |
|                                  | NM_138788.5    | Antisense | GTCCCATTGCGGTGTTCCAA |                 | 4/5  |          |            |
|                                  | NM_001331211.2 |           |                      |                 | 5/6  |          |            |
|                                  | NM_001331212.2 |           |                      |                 | 5/6  |          |            |
| <i>ENPEP</i>                     | NM_001977.4    | Sense     | GAAGAGCTTACCCCCAGCAG | 120             | 1    | 0.4 µM   | 100%       |
|                                  | NM_001379611.1 | Antisense | GACTTGTCCGTTCTCCGTGT |                 |      |          |            |
|                                  | NM_001379612.1 |           |                      |                 |      |          |            |
|                                  | NM_001379613.1 |           |                      |                 |      |          |            |
| <i>SPRY3</i>                     | NM_005840.4    | Sense     | TGAACAGCTGCGCTCTACTC | 237             | 2    | 0.4 µM   | 98%        |
|                                  | NM_001304990.2 | Antisense | GCAGTGGTGCTATGGGACAT |                 | 3    |          |            |
|                                  | NM_001394353.1 |           |                      |                 | 4    |          |            |
|                                  | NM_001394354.1 |           |                      |                 | 4    |          |            |
|                                  | NM_001394355.1 |           |                      |                 | 4    |          |            |
| <i>SQLE</i>                      | NM_003129.4    | Sense     | GCCTGCCTTTCATTGGCTTC | 90              | 1/2  | 0.2 µM   | 99%        |
|                                  |                | Antisense | TTCCTTTTCTGCGCCTCCTG |                 |      |          |            |
| <i>GAPDH</i>                     |                |           |                      | 132             | 4/5  | 0.2 µM   | 95%        |
|                                  | NM_002046.7    | Sense     | CAAATTCCATGGCACCGTCA |                 | 3/4  |          |            |
|                                  | NM_001256799.3 | Antisense | GACTCCACGACGTACTCAGC |                 | 4/5  |          |            |
|                                  | NM_001289745.3 |           |                      |                 | 3/4  |          |            |
|                                  | NM_001289746.2 |           |                      |                 |      |          |            |

| Gene symbol        | Accession      |           | Sequence                   | Amplicon length | Exon | [Primer] | Efficiency |
|--------------------|----------------|-----------|----------------------------|-----------------|------|----------|------------|
| <b>Mouse genes</b> |                |           |                            |                 |      |          |            |
| <i>Ppp1r1b</i>     | NM_144828.2    | Sense     | CCCAACCCCTGTGCCTATAC       | 119             | 4/5  | 0.3 µM   | 90%        |
|                    | NM_001313970.1 | Antisense | TCCCGAAGCTCCCCTAACTC       |                 |      |          |            |
| <i>Afp</i>         | NM_007423.4    | Sense     | AGTTTCCAGAACCTGCCGAG       | 145             | 4/5  | 0.1 µM   | 100%       |
|                    |                | Antisense | ACCTTGTCGTACTGAGCAGC       |                 |      |          |            |
| <i>Tmem45b</i>     | NM_144936.1    | Sense     | TCGGGATAACATCGTGCTGG       | 115             | 4/5  | 100 µM   | 0.2%       |
|                    |                | Antisense | GTCCCATTTCTGGCCTTCCAA      |                 |      |          |            |
| <i>Enpep</i>       | NM_007934.3    | Sense     | GCAAACCCACTCGTGACCTA       | 188             | 1    | 0.2 µM   | 97%        |
|                    |                | Antisense | CAGCCGATAGACACTGTCCC       |                 |      |          |            |
| <i>Spry3</i>       | NM_001030293.3 | Sense     | GCTCTCCCACGCAGTATCAG       | 111             | 4    | 0.2 µM   | 98%        |
|                    | NM_001401849.1 | Antisense | TTGATCAGAGGCAGTGGTGC       |                 |      |          |            |
|                    | NM_001401850.1 |           |                            |                 |      |          |            |
|                    | NM_001401851.1 |           |                            |                 |      |          |            |
| <i>Sqle</i>        | NM_009270.3    | Sense     | TACCTCAGTGTGCGACCTCGT      | 92              | 2    | 0.2 µM   | 99%        |
|                    |                | Antisense | TGGAGAGAACTGCTGCCAAG       |                 |      |          |            |
| <i>Ppib</i>        | NM_011149.2    | Sense     | GGAGATGGCACAGGAGGAA        | 72              | 3/4  | 0.1 µM   | 103%       |
|                    |                | Antisense | GTAGTGCTTCAGCTTGAAGTTCTCAT |                 |      |          |            |
